# Supplementary material for: Discrepancy of C-Reactive Protein, Procalcitonin and Interleukin-6 at Hospitalization: Infection in Patients with Normal C-Reactive Protein, Procalcitonin and High Interleukin-6 Values
Source: MDPI journal article supplement (doi:10.3390/jcm11247324), 2022-12-09
Supplement: s1 [file s1]

**Table S1.** Baseline characteristics of the discrepancy and follow-up dataset.

| Characteristics                                                | Discrepancy Dataset | Follow-Up Dataset |
|----------------------------------------------------------------|---------------------|-------------------|
| Number of total patients                                       | 7149                | 1827              |
| Re-admission                                                   | 0                   | 118               |
| ER visit                                                       | 6725 (94.1)         | 1855 (95.4)       |
| Total number of simultaneous tests                             | 7149                | 5261              |
| Bacteremia or fungemia <sup>a</sup>                            | 597 (8.4)           | 268 (14.7)        |
| 30-day all-cause in-hospital mortality                         | 672 (9.4)           | 285 (15.6)        |
| <b>Trimmed data</b>                                            |                     |                   |
| CRP                                                            |                     |                   |
| < 0.3 mg/L                                                     | 3 (0.04)            | 24 (0.34)         |
| Procalcitonin                                                  |                     |                   |
| > 400 ng/mL                                                    | 3 (0.04)            | 5 (0.07)          |
| < 0.02 ng/mL                                                   | 79 (1.11)           | 55 (0.77)         |
| IL-6                                                           |                     |                   |
| > 5000 pg/mL                                                   | 253 (3.54)          | 181 (2.53)        |
| < 1.5 pg/mL                                                    | 162 (2.27)          | 46 (0.64)         |
| <b>Major symptoms or sings of hospitalization <sup>b</sup></b> |                     |                   |
| Fever, chilling                                                | 2611 (36.5)         | 594 (30.5)        |
| General weakness, poor oral intake                             | 1330 (18.6)         | 254 (13.1)        |
| Dyspnea, DOE, SOB                                              | 957 (13.4)          | 387 (19.9)        |
| Abdominal pain, distension, vomiting                           | 659 (9.2)           | 211 (10.8)        |
| Mental change, loss of consciousness, seizure                  | 539 (7.5)           | 169 (8.7)         |
| Chest pain, discomfort                                         | 486 (6.8)           | 25 (1.3)          |
| Trauma, musculoskeletal pain, wound problems                   | 452 (6.3)           | 96 (4.9)          |
| Hematemesis, hematochezia and melena                           | 377 (5.3)           | 127 (6.5)         |
| Focal neurologic signs <sup>c</sup> , dysarthria               | 305 (4.3)           | 101 (5.2)         |
| Syncope, collapse                                              | 287 (4.0)           | 164 (8.4)         |
| Urinary symptom <sup>d</sup>                                   | 197 (2.8)           | 87 (4.5)          |
| Skin rash                                                      | 160 (2.2)           | 17 (0.9)          |
| General edema                                                  | 138 (1.9)           | 38 (2.0)          |
| Hemoptysis, blood-tinged sputum                                | 84 (1.8)            | 21 (1.1)          |

Data were expressed as number (percent) or median (interquartile range). <sup>a</sup>It means-a case in which the microorganisms were identified in the blood cultures conducted within 3 days of admission. <sup>b</sup> Several patients had the multiple reasons. <sup>c</sup>Include weakness of extremities and paralysis or sensory change. <sup>d</sup>Include urinary retention, incontinence, frequency, urgency, dysuria or hematuria. Aberrations: CRP, C-reactive protein; DOE, dyspnea on exertion; ER, emergency room; IL, interleukin; SOB, shortness of breath.

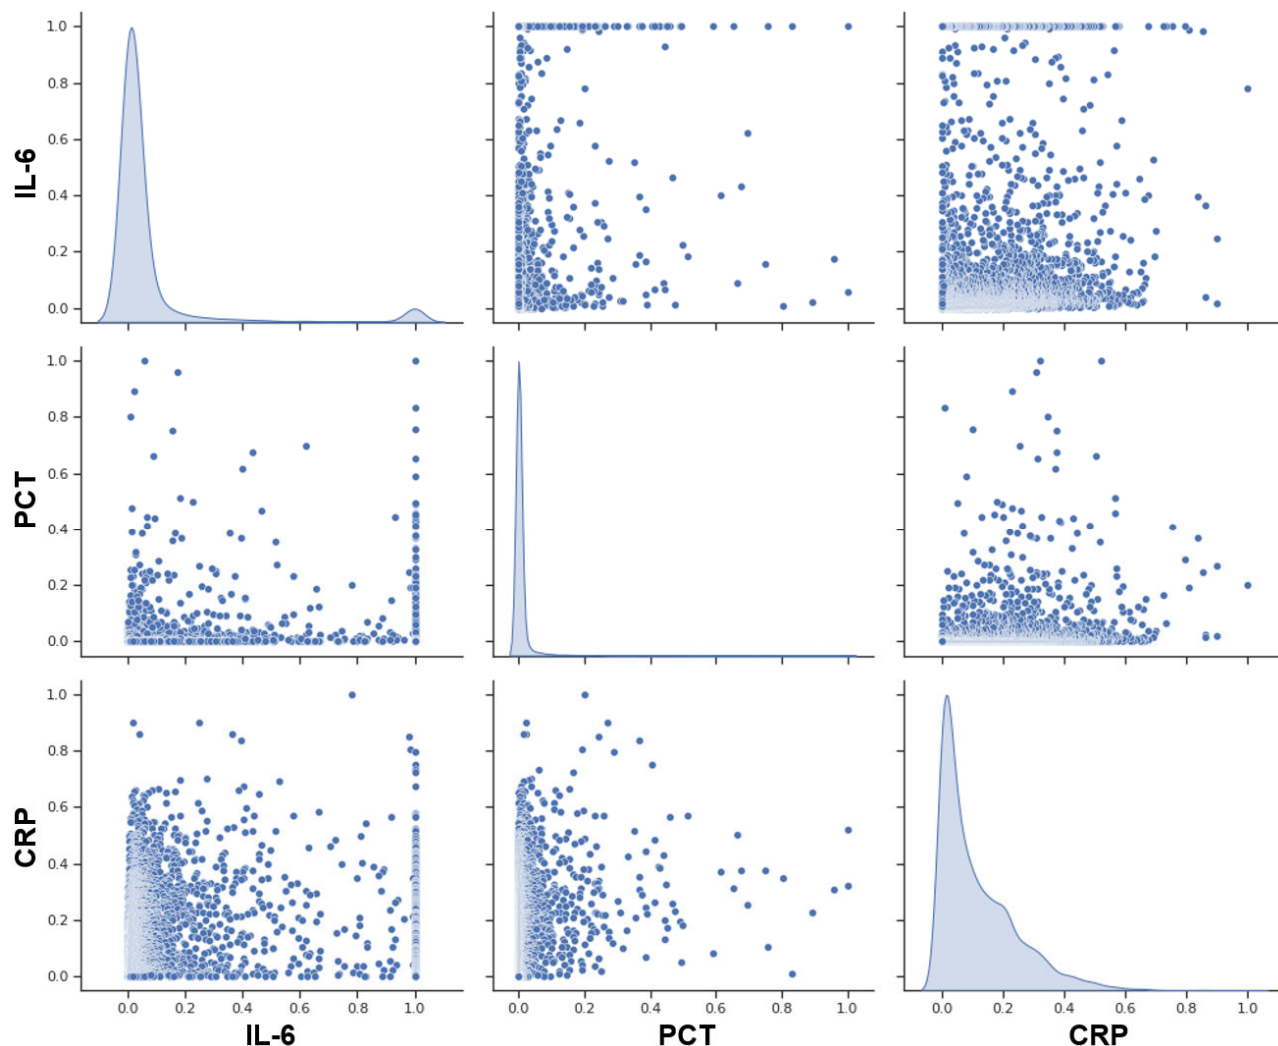

**Figure S1.** Pair plots of the normalized CRP, PCT, and IL-6 values (discrepancy dataset). The three graphs located on the diagonal of the figure show the distribution of each of CRP, PCT, and IL-6 obtained by the kernel density estimation method.

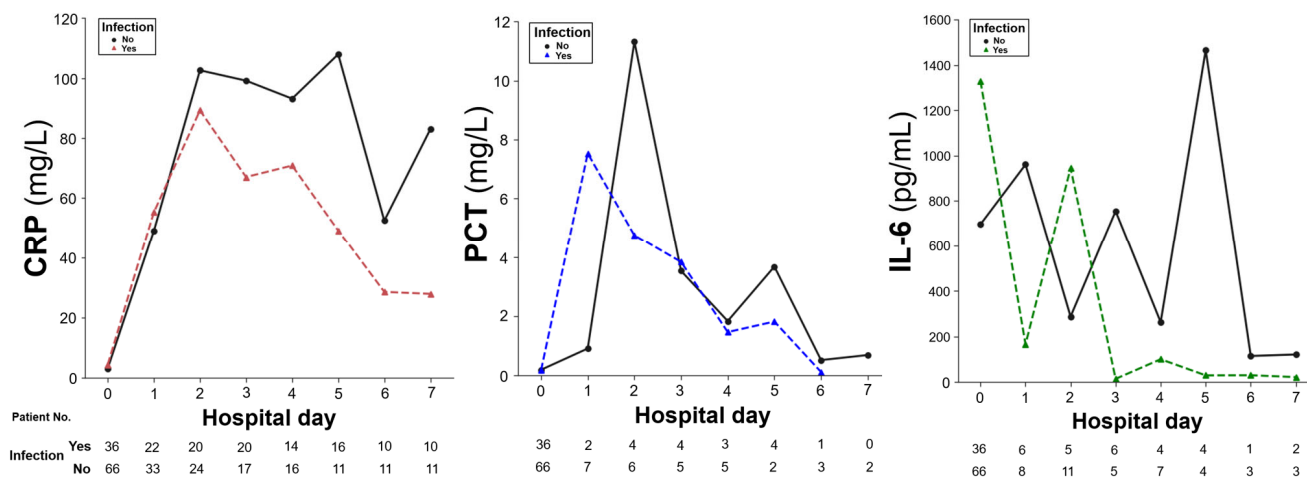

**Figure S2.** Changes of three inflammatory markers in patients with normal CRP and procalcitonin but high IL-6 levels within 24 hours of admission according to presence of infection. Each point represents the average of the measured values.
